# Supplementary material
Source: ML conference proceedings conference paper supplement (https://aclanthology.org/N18-2027)
Supplement: Datasets [file guidelines_german.pdf › DURel/guidelines/guidelines_german.pdf]

# Annotationsrichtlinien für Semantischen Bezug Historischer Wortverwendungen

10. Januar 2018

**Einführung.** Ihre Aufgabe ist es, den Grad des semantischen Bezugs zweier Verwendungen eines Wortes zu bewerten. Ihnen werden Satzpaare wie in (1) vorgelegt, wobei Sie den semantischen Bezug der beiden Verwendungen des markierten Wortes, hier *umwälzen* in (1a) und (1b), bewerten sollen.

- (1)     a. Kinadon wollte den Staat **umwälzen**.  
          b. Ich muß mich **umwälzen** und kann keinen Schlaf in meine Augen bringen.

**Aufgabenstruktur.** Sie bekommen ein ODS-Tabellendokument wie in Tabelle 1 illustriert. Eine Zeile der Tabelle entspricht einem Satzpaar. Für jede solche Zeile gibt es demgemäß eine Spalte „Satz 1“ und eine Spalte „Satz 2“, die jeweils eine Verwendung desselben Wortes mit Kontext enthalten. Das Zielwort ist in beiden Kontexten fett markiert. Ihre Aufgabe ist es, für jedes dieser Satzpaare zu bewerten, wie stark die Bezogenheit der beiden Verwendungen des Zielwortes in den beiden Sätzen ist.

Da Sprache oft mehrdeutig ist, ist es wichtig, dass Sie jeden Satz eines Satzpaares zunächst einzeln lesen und sich für die plausibelste Bedeutung des Zielwortes entscheiden, BEVOR Sie die beiden Verwendungen des Wortes vergleichen. In einigen Fällen liefern die Sätze schon genügend Information, um die Bedeutung des Zielwortes zu verstehen; für unklare Fälle finden Sie jedoch darüber hinaus zusätzlichen Kontext in Grau.

|   | A                                                                                                                                                                                                                                                                                                                                                                                                                                                                                                                                                                                                                   | B                | C                | D                                                                                                                                                                                                                                                                                                                                          | E | F |
|---|---------------------------------------------------------------------------------------------------------------------------------------------------------------------------------------------------------------------------------------------------------------------------------------------------------------------------------------------------------------------------------------------------------------------------------------------------------------------------------------------------------------------------------------------------------------------------------------------------------------------|------------------|------------------|--------------------------------------------------------------------------------------------------------------------------------------------------------------------------------------------------------------------------------------------------------------------------------------------------------------------------------------------|---|---|
| 1 | <b>Satz 1</b>                                                                                                                                                                                                                                                                                                                                                                                                                                                                                                                                                                                                       | <b>Bewertung</b> | <b>Kommentar</b> | <b>Satz 2</b>                                                                                                                                                                                                                                                                                                                              |   |   |
| 2 | Ihr treibt das Geben noch weiter als ich das Naschen. <b>Schon der vorige Kuchen, den ich allein esse, wiegt 10 Geburtstagskuchen auf.</b> Ich nehme diesen von deiner Liebe gar an; aber der Ultima-Kuchen aus Hof — dieser ist Penultima- und der erste Antepenultima-Kuchen — kann, soll etwas davon für mich abgeschnitten werden, auf mein h. Wort, nur für gleiche Bezahlung angenommen werden.                                                                                                                                                                                                               |                  |                  | Der Benediktiner hatte eine Schlüssel der schönsten und größten Pfirsichen zum Geschenk erhalten, die er zum Nachtsch auftragen ließ, und dem Prinzen die köstlichste mit einer lächelnden und frommen Miene hinreichte. <b>Der Prinz theilte sie mit seiner Geliebten, und sie aßen beyde die Pfirsiche ohne Verdacht.</b> Man stund auf. |   |   |
| 3 | Hier schlug er seine Bude auf, und rief den Pöbel zusammen, seine schöne Raritäten zu schauen. <b>Das Volk drang hinzu, Mägde und Knechte, Jungfrauen und Wittwen, Kinder und Greise.</b> Der Teufel gaukelte ihnen allerley Histörchen vor, die er mit frommen Erläuterungen und moralischen Sprüchen begleitete.                                                                                                                                                                                                                                                                                                  |                  |                  | Zum Namenstag. <b>Die sechs nächsten Wesen sind ihr Mann und die fünf Kinder.</b> 260.                                                                                                                                                                                                                                                     |   |   |
| 4 | Die Fraw aber / gleichsamb ob sie nichts von der Fabel wiste / fragte fleissig nach allem / wer das Kind were / warumb man es verstossen / vnd den jungen Knaben / von solcher Schönheit daß die Natur nichts an ihm vergessen / also weggeworffen hette. <b>Er gab für / ihm were weiter nichts wissendt / als dass er ihn auff einem Scheidwege am Wald / da niemandt als Hirten vnd Jäger hin kämen / gefunden; dahin er entweder vnbarmhertziger weise / oder auß höchstdringender Noth müßte gelegt worden seyn.</b> Also nam Sicambre das weinende Kindt / vnd schweigte es / in dem sie ihm zu trincken gab. |                  |                  | Auf der Erde werden Kinder Gottes geboren, die von den Menschen Genies genannt werden. <b>Ein jedes von ihnen wird in früher Jugend an einen Scheidweg gestellt und muß seine Wahl treffen.</b> Seine Gabe ist ihm verliehen für andere sowohl wie für sich selbst.                                                                        |   |   |
|   | Ferner: solange der einzelne Geschäftsmann alle Zahlungen unmittelbar aus seiner Kasse leistet, bzw. in dieselbe einnimmt, muss er zu den Zeiten, wo regelmässig grössere Summen fällig werden, einen erheblichen Barbestand beschaffen und                                                                                                                                                                                                                                                                                                                                                                         |                  |                  | Ich fand lat. 43 ° 14 ', long. wahrscheinlich 51°14'. <b>Auf der Bank haben wir keinen Seetang gesehen, auch nicht westlich seit dem 8ten Juli.</b> Wenige Tage, ehe wir die Bank von Neufundland berührten, waren, was in dieser Jahreszeit (Mitte                                                                                        |   |   |

Tabelle 1: Annotationstabelle.

**Bewertungsskala.** Die Skala, die Sie für Ihre Bewertung nutzen, reicht von 1 (die beiden Verwendungen des Zielwortes haben völlig unterschiedliche Bedeutungen) bis 4 (die beiden Verwendungen haben identische Bedeutungen). Diese vierstufige Skala ist in Tabelle 2 dargestellt.

- 4: Identisch
- 3: Enger Bezug
- 2: Entfernter Bezug
- 1: Kein Bezug

0: Kann nicht entscheiden

Tabelle 2: Vierstufige Skala des Semantischen Bezugs.

Bitte versuchen Sie, Unterschiede zwischen Verwendungen, die nicht ihre Bedeutung betreffen, zu ignorieren. Z. B. können *isst* und *aß* dieselbe Bedeutung ausdrücken, obwohl das eine Wort in der Gegenwartsform und das andere in der Vergangenheitsform steht. Auch sind z. B. Unterschiede zwischen Singular und Plural (wie bei *Karotte* vs. *Karotten*) typischerweise irrelevant für die Bedeutung.

Beachten Sie, dass es keine richtigen oder falschen Antworten bei dieser Aufgabe gibt. Also geben Sie bitte Ihre subjektive Meinung ab. Versuchen Sie jedoch, konsistente Bewertungen zu treffen.

**Annotationsbeispiele.** Wir betrachten nun die einzelnen Zeilen von Tabelle 1 genauer und mit Bewertungsbeispielen, um die verschiedenen Grade des semantischen Bezugs zu illustrieren, die Sie bei der Annotation antreffen könnten. Beachten Sie bitte, wie oben schon erwähnt, dass dies nur Beispiele sind, und Sie immer ihre subjektive Meinung abgeben sollen.

Die beiden Verwendungen von *essen* in Beispiel A werden als identisch in ihrer Bedeutung bewertet (Bewertung: 4), da beide Verwendungen auf den physikalischen Akt der Essenseinnahme referieren.

|   | A                                                                                                                                                                                                                                                                                                                                                                                              | B         | C         | D                                                                                                                                                                                                                                                                                                                                  |
|---|------------------------------------------------------------------------------------------------------------------------------------------------------------------------------------------------------------------------------------------------------------------------------------------------------------------------------------------------------------------------------------------------|-----------|-----------|------------------------------------------------------------------------------------------------------------------------------------------------------------------------------------------------------------------------------------------------------------------------------------------------------------------------------------|
| 1 | Satz 1                                                                                                                                                                                                                                                                                                                                                                                         | Bewertung | Kommentar | Satz 2                                                                                                                                                                                                                                                                                                                             |
| 2 | Ihr treibt das Geben noch weiter als ich das Naschen. Schon der vorige Kuchen, den ich allein esse, wiegt 10 Geburtstagstorten auf. Ich nehme diesen von deiner Liebe gar an; aber der Ultima-Kuchen aus Hof — dieser ist Penultima- und der erste Antepenultima-Kuchen — kann, soll etwas davon für mich abgeschnitten werden, auf mein h. Wort, nur für gleiche Bezahlung angenommen werden. | 4         |           | Der Benediktiner hatte eine Schüssel der schönsten und größten Pfirsichen zum Geschenk erhalten, die er zum Nachtsch auftragen ließ, und dem Prinzen die köstlichste mit einer lächelnden und frommen Miene hinreichte. Der Prinz theilte sie mit seiner Geliebten, und sie aßen beyde die Pfirsiche ohne Verdacht. Man stund auf. |

Beispiel A: Bewertung 4 (Identisch).

Im Gegensatz dazu haben die beiden Verwendungen von *Kind* in Beispiel B zwar einen engen semantischen Bezug, sind aber nicht mehr identisch (Bewertung: 3), da die Bedeutung von *Kind(er)* in Satz 1 als „junger Mensch“ umschrieben werden kann, während die Bedeutung in Satz 2 eher „Nachkomme“ entspricht.

|   | A                                                                                                                                                                                                                                                                                                           | B         | C         | D                                                                               |
|---|-------------------------------------------------------------------------------------------------------------------------------------------------------------------------------------------------------------------------------------------------------------------------------------------------------------|-----------|-----------|---------------------------------------------------------------------------------|
| 1 | Satz 1                                                                                                                                                                                                                                                                                                      | Bewertung | Kommentar | Satz 2                                                                          |
| 3 | Hier schlug er seine Bude auf, und rief den Pöbel zusammen, seine schöne Raritäten zu schauen. Das Volk drang hinzu, Mägde und Knechte, Jungfrauen und Wittwen, Kinder und Greise. Der Teufel gaukelte ihnen allerley Histörchen vor, die er mit frommen Erläuterungen und moralischen Sprüchen begleitete. | 3         |           | Zum Namenstag. Die sechs nächsten Wesen sind ihr Mann und die fünf Kinder. 260. |

Beispiel B: Bewertung 3 (Enger Bezug).

Die beiden Verwendungen von *Scheideweg* in Beispiel C haben noch einen semantischen Bezug, jedoch nur entfernt (Bewertung: 2): die beiden Bedeutungen sind sich bildlich ähnlich, da beide eine Art von Entscheidung beinhalten. Es handelt sich aber entgegen dem obigen *Kinder*-Beispiel hier um zwei unterschiedliche Bedeutungen von *Scheideweg*.

Bewertung 1 wird benutzt für Verwendungen, deren Bedeutungen keinen Bezug zueinander haben, wie im Fall von *Bank* in Beispiel D. Dieses Verwendungspaar ist semantisch noch weiter voneinander entfernt als die beiden Verwendungen von *Scheideweg* oben. Flussbänke und Geldbänke haben keinen semantischen Bezug.

Schließlich haben Sie noch die Möglichkeit, „Kann nicht entscheiden“ (Bewertung: 0) zu annotieren. Bitte nutzen Sie diese Möglichkeit nur, wenn absolut notwendig, d. h.

|   | A                                                                                                                                                                                                                                                                                                                                                                                                                                                                                                                                                                                                                  | B                | C                | D                                                                                                                                                                                                                                                                   |
|---|--------------------------------------------------------------------------------------------------------------------------------------------------------------------------------------------------------------------------------------------------------------------------------------------------------------------------------------------------------------------------------------------------------------------------------------------------------------------------------------------------------------------------------------------------------------------------------------------------------------------|------------------|------------------|---------------------------------------------------------------------------------------------------------------------------------------------------------------------------------------------------------------------------------------------------------------------|
| 1 | <b>Satz 1</b>                                                                                                                                                                                                                                                                                                                                                                                                                                                                                                                                                                                                      | <b>Bewertung</b> | <b>Kommentar</b> | <b>Satz 2</b>                                                                                                                                                                                                                                                       |
| 4 | Die Fraw aber / gleichsamb ob sie nichts von der Fabel wiste / fragte fleissig nach allem / wer das Kind were / warumb man es verstossen / vnd den jungen Knaben / von solcher Schönheit daß die Natur nichts an ihm vergessen / also weggeworffen hette. Er gab für / ihm were weiter nichts wissendt / als dass er ihn auff einem <b>Scheidwege</b> am Wald / da niemandt als Hirten vnd Jäger hin kämen / gefunden; dahin er entweder vnarmhertziger weise / oder auß höchstdringender Noth müßte gelegt worden seyn. Also nam Sicambre das weinende Kindt / vnd schweigte es / in dem sie ihm zu trincken gab. | 2                |                  | Auf der Erde werden Kinder Gottes geboren, die von den Menschen Genies genannt werden. Ein jedes von ihnen wird in früher Jugend an einen <b>Scheidweg</b> gestellt und muß seine Wahl treffen. Seine Gabe ist ihm verliehen für andere sowohl wie für sich selbst. |

Beispiel C: Bewertung 2 (Entfernter Bezug).

|   | A                                                                                                                                                                                                                                                                                                                                                                                                                                                                                                                           | B                | C                | D                                                                                                                                                                                                                                                                                                                                                                                                                                           |
|---|-----------------------------------------------------------------------------------------------------------------------------------------------------------------------------------------------------------------------------------------------------------------------------------------------------------------------------------------------------------------------------------------------------------------------------------------------------------------------------------------------------------------------------|------------------|------------------|---------------------------------------------------------------------------------------------------------------------------------------------------------------------------------------------------------------------------------------------------------------------------------------------------------------------------------------------------------------------------------------------------------------------------------------------|
| 1 | <b>Satz 1</b>                                                                                                                                                                                                                                                                                                                                                                                                                                                                                                               | <b>Bewertung</b> | <b>Kommentar</b> | <b>Satz 2</b>                                                                                                                                                                                                                                                                                                                                                                                                                               |
| 5 | Ferner: solange der einzelne Geschäftsmann alle Zahlungen unmittelbar aus seiner Kasse leistet, bezw. in dieselbe einnimmt, muss er zu den Zeiten, wo regelmässig grössere Summen fällig werden, einen erheblichen Barbestand beschaffen und andererseits in den Zeiten überwiegender Eingänge dieselben sogleich zweckmässig unterzubringen wissen. Die Konzentrierung des Geldverkehrs in den grossen <b>Banken</b> enthebt ihn dieses periodischen Zwanges zur Aufhäufung und Drainierung; Endlich ein letztes Beispiel. | 1                |                  | Ich fand lat. 43 ° 14 ', long. wahrscheinlich 51°4. Auf der <b>Bank</b> haben wir keinen Seetang gesehen, auch nicht westlich seit dem 8ten Juli. Wenige Tage, ehe wir die Bank von Neufundland berührten, waren, was in dieser Jahreszeit (Mitte Juli's) sehr ungewöhnlich ist, grosse Eismassen gesehen worden, die sich nach Südwest bewegten, während der gewöhnliche Strom auf dem südlichen Theil der Bank nach Norden gerichtet ist. |

Beispiel D: Bewertung 1 (Kein Bezug).

wenn Sie keine Entscheidung über den Grad des semantischen Bezugs zwischen den beiden fett markierten Wörtern treffen können. Bitte hinterlassen Sie in diesem Fall auch einen Kommentar, warum Sie keine Entscheidung treffen können.

**Historische Sprachdaten.** Die Sätze für diese Annotationsaufgabe wurden aus dem historischen Korpus *Deutsches Textarchiv (erweitert)*<sup>1</sup> ausgelesen. Insgesamt sind es 1320 Satzpaare. Sätze können mehr als einmal in der Tabelle vorkommen.

Da sich Sprache mit der Zeit verändert, kann es sein, dass Worte anders benutzt werden, als Sie es gewohnt sind. Wenn Sie sich unsicher über die Bedeutung eines Wortes oder einer Konstruktion in einem Satz sind, versuchen Sie sie aus der Bedeutung des Kontexts zu erschließen.

Die Sätze können sehr kurz oder sehr lang sein und ungrammatisch erscheinen. Außerdem können Worte anders geschrieben sein, als Sie es gewohnt sind. Es wurde versucht, die Leserlichkeit durch Normalisierung spezieller Buchstaben zu moderner Orthographie zu verbessern.

Versuchen Sie, diese Umstände zu ignorieren; konzentrieren Sie sich nur auf die Be-

<sup>1</sup><http://www.deutschestextarchiv.de/>

deutung der Zielwörter in ihren Kontexten. Wenn Sie einen Satz zu fehlerhaft finden, um ihn zu verstehen, die Verwendung des Zielwortes mehrdeutig ist, oder die beiden Verwendungen des Zielwortes nicht zusammenpassen (d. h., nicht dasselbe Lemma haben), notieren Sie dies bitte auch in der Kommentarspalte.

**Durchführung.** Während der Annotation der Satzpaare können Sie immer zu vorherigen Bewertungen zurückgehen und diese ändern; z. B. falls Sie Ihre Meinung ändern, nachdem Sie mehr Informationen bekommen haben.

Sie müssen nicht die ganze Datei in einer Sitzung annotieren. Wenn Sie einen Kommentar hinterlassen wollen, können Sie diesen in das Kommentarfeld eintragen.

Es kann hilfreich sein, die Rechtschreibprüfung zu deaktivieren, um nicht durch zusätzliche Hervorhebungen gestört zu werden.

**Abschluss.** Bitte stellen Sie sicher, dass Sie nichts in der Datei ändern außer Spaltenbreite, Schriftgröße, Ihren Bewertungen und Kommentaren. Schicken Sie das annotierte Dokument an e-mail. Wenn Sie noch Fragen zur Aufgabe haben, zögern Sie nicht, diese zu stellen.
